# Supplementary material for: Identification and Classification of Coix seed Storage Years Based on Hyperspectral Imaging Technology Combined with Deep Learning
Source: MDPI journal article supplement (doi:10.3390/foods13030498), 2024-02-04
Supplement: s1 [file s1]

# **Identification and classification of *Coix seed* storage years based on hyperspectral imaging technology combined with deep learning**

Ruibin Bai<sup>a</sup>, Junhui Zhou<sup>a</sup>, Siman Wang<sup>a</sup>, Yue Zhang<sup>a</sup>, Tiegui Nan<sup>a</sup>, Chu Zhang<sup>b\*</sup>, Jian Yang<sup>a\*</sup>

<sup>a</sup> State Key Laboratory for Quality Ensurance and Sustainable Use of Dao-di Herbs, National Resource Center for Chinese Materia Medica, China Academy of Chinese Medical Sciences, Beijing, 100700, China

<sup>b</sup> School of Information Engineering, Huzhou University, Huzhou, 313000, China

Table S1 The feature wavelengths selected by successive projections algorithm.

|    | Number | Characteristic wavelengths (nm)                                                                                                                                                  |
|----|--------|----------------------------------------------------------------------------------------------------------------------------------------------------------------------------------|
| YN | 21     | 1651.82, 773.39, 1728.12, 453.75, 914.25, 1886.18, 957.59, 865.49, 578.36, 1095.88, 1444.70, 746.30, 2224.10, 486.26, 2305.86, 1357.49, 659.62, 948.72, 1989.74, 954.17, 2436.67 |
| GZ | 16     | 1401.10, 1204.89, 908.84, 2229.56, 1439.25, 963.01, 843.82, 1095.88, 1989.74, 486.26, 464.59, 610.86, 432.079969, 2458.47, 1935.23, 415.83                                       |

Table S2 The feature wavelengths selected by competitive adaptive reweighted sampling algorithm.

|    | Number | Characteristic wavelengths (nm)                                                                                                                                                                                                                                                                                                                                                                                                                                                                                                                                                                                                                                                                                                                                                                                                                    |
|----|--------|----------------------------------------------------------------------------------------------------------------------------------------------------------------------------------------------------------------------------------------------------------------------------------------------------------------------------------------------------------------------------------------------------------------------------------------------------------------------------------------------------------------------------------------------------------------------------------------------------------------------------------------------------------------------------------------------------------------------------------------------------------------------------------------------------------------------------------------------------|
| YN | 108    | 426.66, 448.33, 453.75, 464.59, 470.00, 486.26, 491.67, 535.02, 540.43, 551.27, 556.69, 600.03, 605.44, 670.46, 692.13, 702.96, 773.39, 784.23, 789.64, 795.06, 800.48, 827.57, 832.98, 838.40, 843.82, 865.49, 908.83, 914.25, 919.67, 973.84, 979.26, 984.68, 948.72, 954.17, 959.62, 965.07, 1003.22, 1019.57, 1025.02, 1030.47, 1035.92, 1041.37, 1068.63, 1074.08, 1139.48, 1144.93, 1150.38, 1155.83, 1161.28, 1188.53, 1204.89, 1215.79, 1221.24, 1226.69, 1232.14, 1237.59, 1243.04, 1248.49, 1302.99, 1308.44, 1313.89, 1319.34, 1330.24, 1335.69, 1341.14, 1346.60, 1422.90, 1428.35, 1450.15, 1461.05, 1466.50, 1471.95, 1510.11, 1531.91, 1537.36, 1597.31, 1602.76, 1608.21, 1613.66, 1624.56, 1630.01, 1640.91, 1673.62, 1706.32, 1711.77, 1728.12, 1793.52, 1798.97, 1809.88, 1858.93, 1864.38, 1869.83, 1897.08, 1913.43, 1929.78, |

|    |     |                                                                                                                                                                                                                                                                                                                                                                                                                                                                                                                                                                                                                                                                                                                                                                                                                                                                                                                                                                      |
|----|-----|----------------------------------------------------------------------------------------------------------------------------------------------------------------------------------------------------------------------------------------------------------------------------------------------------------------------------------------------------------------------------------------------------------------------------------------------------------------------------------------------------------------------------------------------------------------------------------------------------------------------------------------------------------------------------------------------------------------------------------------------------------------------------------------------------------------------------------------------------------------------------------------------------------------------------------------------------------------------|
|    |     | 1967.94, 1978.84, 1984.29, 2016.99, 2066.04, 2098.74, 2196.85, 2240.45, 2267.71, 2300.41, 2311.31, 2327.66, 2507.52                                                                                                                                                                                                                                                                                                                                                                                                                                                                                                                                                                                                                                                                                                                                                                                                                                                  |
| GZ | 108 | 464.59, 486.26, 507.93, 513.34, 535.02, 540.43, 545.85, 551.27, 567.52, 589.19, 610.86, 621.70, 627.11, 643.37, 665.04, 670.46, 719.21, 724.63, 730.05, 735.47, 746.30, 784.23, 800.48, 822.15, 865.49, 870.91, 876.33, 887.16, 892.58, 903.41, 914.25, 946.76, 957.59, 968.43, 954.17, 959.62, 992.32, 1025.02, 1074.08, 1095.88, 1150.38, 1166.73, 1215.79, 1226.69, 1237.59, 1243.04, 1248.49, 1270.29, 1275.74, 1281.19, 1292.09, 1308.44, 1319.34, 1324.79, 1330.24, 1335.69, 1341.14, 1357.50, 1362.95, 1379.30, 1390.20, 1395.65, 1401.10, 1406.55, 1412.00, 1428.35, 526.46, 1575.51, 1580.96, 1586.41, 1635.46, 1662.72, 1679.07, 1684.52, 1695.42, 1733.57, 1837.13, 1864.38, 1875.28, 1880.73, 1886.18, 1891.63, 1902.53, 1973.39, 1978.84, 1984.29, 2006.09, 2011.54, 2027.89, 2033.34, 2055.14, 2066.04, 2109.65, 2115.10, 2120.55, 2131.45, 2175.05, 2185.95, 2218.65, 2224.10, 2229.55, 2240.45, 2256.81, 2278.61, 2365.81, 2442.12, 2458.47, 2480.27 |
